# Supplementary material for: Micropublications: a semantic model for claims, evidence, arguments and annotations in biomedical communications
Source: Springer Nature journal article supplement (doi:10.1186/2041-1480-5-28), 2014-01-01
Supplement: 13326_2013_208_MOESM3_ESM.pdf [file 13326_2013_208_MOESM3_ESM.pdf]

## Relationship of Micropublications to the SWAN Model

Additional Material 3 for:

*Micropublications: a Semantic Model for Claims, Evidence, Arguments and Annotations in Biomedical Communications*

Tim Clark<sup>1,2,3\*</sup>, Paolo N. Ciccarese<sup>1,2</sup>, Carole A. Goble<sup>3</sup>

<sup>1</sup> Department of Neurology, Massachusetts General Hospital  
55 Fruit Street, Boston MA 02114, USA

<sup>2</sup> Harvard Medical School  
25 Shattuck Street, Boston, MA 02115 USA

<sup>3</sup> School of Computer Science, University of Manchester  
Oxford Road, Manchester M13 9PL, UK

\* Corresponding author

Email addresses:

TC: [tim\\_clark@harvard.edu](mailto:tim_clark@harvard.edu); [clarkt@cs.manchester.ac.uk](mailto:clarkt@cs.manchester.ac.uk)

PNC: [paolo.ciccarese@gmail.com](mailto:paolo.ciccarese@gmail.com)

CAG: [carole.goble@cs.manchester.ac.uk](mailto:carole.goble@cs.manchester.ac.uk)

### A.3 Relationship of Micropublications to the SWAN Model

It may be helpful to outline some of the principal differences and correspondences between the micropublications ontology (mp), and SWAN [1].

- Hypotheses and Micropublications
  - A `swan:Hypothesis` corresponds most closely to an `mp: Micropublication` together with the Claim it argues.
- Claims and Statements
  - A `swan:Claim` roughly corresponds to an `mp:Statement`.
- Evidence
  - SWAN models evidence for Claims in the form of literature citations, while Micropublications also model Data and Methods.
  - Micropublications support both literature citations-as-support (document level) as well as direct Claim / Statement citations (statement level).
- Statement Consistency
  - In SWAN, a knowledgebase curator asserts inconsistency, between Claims globally, at a single point.
  - In Micropublications, inconsistency is modeled as *challenge*, and may be asserted by anyone. There may or may not be a global curator, as needed.
- Statement Similarity
  - SWAN implemented the notion of statement similarity using “canonical statements”.

- Micropublications models statement similarity using similarity groups and uses the holotype of such a group as a surrogate claim to represent the common meaning.
- Micropublications similarity groups may be asserted as Micropublications themselves.
- Multi-polarity
  - SWAN does not model multipolar argumentation. The concept of inconsistency is vague, relatively subjective, and global.
  - Micropublications models multipolar argumentation, using challenge relationships. It is therefore compatible with bipolar argumentation frameworks. Furthermore, its *challenge* and *supports* relationships are explicitly published with attribution and authority, enabling multiple viewpoints to coexist and be selected/deselected.
- Abstraction and Annotation
  - SWAN and Micropublications both support Comments.
  - Micropublications supports translation of Claims into more or less any useful formal language capable of representing them in the required domain.
  - Micropublications re-formalizations of Claims in other micropublications are also micropublications.
- Layering
  - SWAN does not have formal mechanisms to support layering.
  - Micropublications explicitly support layering. A Micropublications may be constructed about another Micropublications, and this may be layered as deeply as one wishes.
- Grounding
  - The Micropublications model is theoretically grounded in Argumentation Theory. SWAN is not.

## REFERENCES

1. Ciccarese P, Wu E, Wong G, Ocana M, Kinoshita J, Ruttenberg A, Clark T: **The SWAN biomedical discourse ontology**. *J Biomed Inform* 2008, **41**(5):739-751.
